# Supplementary material for: Sugarcane ScDREB2B-1 Confers Drought Stress Tolerance in Transgenic Nicotiana benthamiana by Regulating the ABA Signal, ROS Level and Stress-Related Gene Expression
Source: MDPI journal article supplement (doi:10.3390/ijms23179557), 2022-08-23
Supplement: s1 [file s1]

# Sugarcane *ScDREB2B-1* Confers Drought Stress Tolerance in Transgenic *Nicotiana benthamiana* by Regulating the ABA Signal, ROS Level and Stress-related Gene Expression

Yufeng Chen<sup>1</sup>, Zhu Li<sup>1</sup>, Tingting Sun<sup>1</sup>, Dongjiao Wang<sup>1</sup>, Zhoutao Wang<sup>1</sup>, Chang Zhang<sup>1</sup>, Youxiong Que<sup>1</sup>, Jinlong Guo<sup>1</sup>, Liping Xu<sup>1,\*</sup> and Yachun Su<sup>1,2,\*</sup>

<sup>1</sup> Key Laboratory of Sugarcane Biology and Genetic Breeding, Ministry of Agriculture and Rural Affairs, College of Agriculture, Fujian Agriculture and Forestry University, Fuzhou, Fujian, 350002, China

<sup>2</sup> Key Laboratory of Sugarcane Biotechnology and Genetic Improvement (Guangxi), Ministry of Agriculture and Rural Affairs/Guangxi Key Laboratory of Sugarcane Genetic Improvement/Sugarcane Re-search Institute, Guangxi Academy of Agricultural Sciences, Nanning 530007, China

\* Correspondences: xlpmail@126.com (L.X.); syc2009mail@163.com (Y.S.); Tel.: +86-591-8385-2547 (L.X. & Y.S.)

**Supplementary Figures and Tables**

**Figure S1. Nucleic acid sequence alignment of the cDNA and DNA sequences of *ScDREB2B-1* gene.** The red arrow was the ORF sequence.

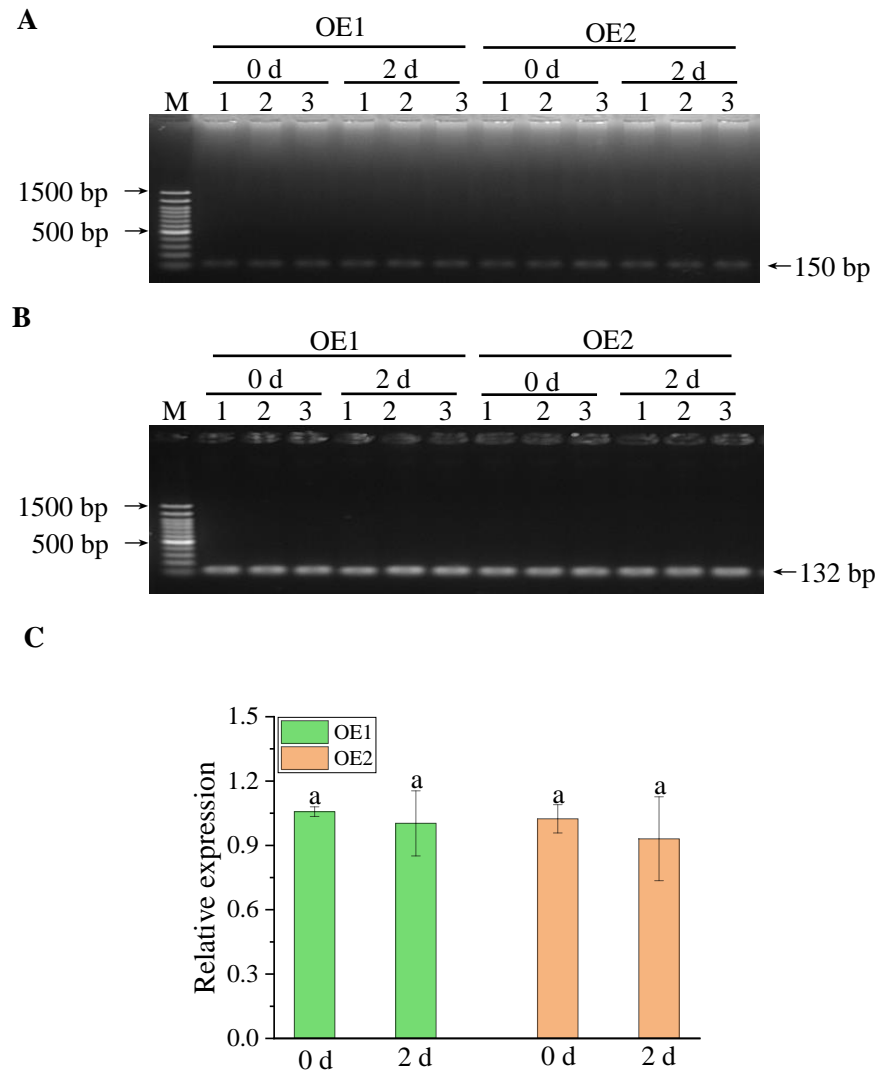

**Figure S2 Detection of the *ScDREB2B-1* gene in two transgenic *Nicotiana benthamiana* lines under drought stress for 2 d.** (A) RT-PCR analysis of the *NbEF1α* gene with the primers *NbEF1α*-F/R (Table S1); (B) RT-PCR analysis of the *ScDREB2B-1* gene with the primers RT-qPCR-*ScDREB2B-1*-F/R (Table S1). M: 100 bp-III DNA marker; OE1 and OE2: different transgenic *N. benthamiana* lines overexpressed *ScDREB2B-1*. 1-3: PCR amplification products of different duplicates transgenic *N. benthamiana* plants overexpressed *ScDREB2B-1*. (C) The relative expression level analysis of the *ScDREB2B-1* gene by RT-qPCR method. *NbEF1α* was used as the internal reference gene. All data points were means  $\pm$  standard error ( $n=3$ ). Significant differences were found between different letter substitutes on the column calculated by Duncan's new multiple range test ( $P$ -value  $< 0.05$ ).

**Table S1 Primers used in this study**

| <b>Primer name</b>             | <b>Primer sequences (5'-3')</b>                     |
|--------------------------------|-----------------------------------------------------|
| pMD19-T- <i>ScDREB2B-1</i> -F  | TAGTGTGTGCGCTTGACCA                                 |
| pMD19-T- <i>ScDREB2B-1</i> -R  | GCAGTGTTCCTTCCACTT                                  |
| RT-qPCR- <i>ScDREB2B-1</i> -F  | ACACAATGTGGGTACCGTGG                                |
| RT-qPCR- <i>ScDREB2B-1</i> -R  | ATAGGCCCTAGCTGCATCCT                                |
| Promoter- <i>ScDREB2B-1</i> -F | CGTGAACCTGTGCCAATG                                  |
| Promoter- <i>ScDREB2B-1</i> -R | CTCCCGTAAATTCAAATGG                                 |
| pGBKT7- <i>ScDREB2B-1</i> -F   | CATGGAGGCCGAATTCATGGGTTTCAAGAAGGGCTG                |
| pGBKT7- <i>ScDREB2B-1</i> -R   | GGATCCCCGGGAATTCCTTTAGCTGCTCCAGACCCT                |
| CD3689- <i>ScDREB2B-1</i> -F   | GGGGACAAGTTTGTACAAAAAAGCAGGCTTCATGGGTTTCAAGAAGGGCTG |
| CD3689- <i>ScDREB2B-1</i> -R   | GGGGACCACTTTGTACAAGAAAGCTGGGTCTTTTAGCTGCTCCAGACCCT  |
| <i>NbEF1α</i> -F               | TGCTGCTGTAACAAGATGGATGC                             |
| <i>NbEF1α</i> -R               | GAGATGGGGACAAAGGGGATT                               |
| <i>NbRbohA</i> -F              | ACACACGCCATCAGAACTCCA                               |
| <i>NbRbohA</i> -R              | CCCACCCAACCAAAATACGC                                |
| <i>NbRbohB</i> -F              | GTTTGCCAGCCACCACCTAAT                               |
| <i>NbRbohB</i> -R              | AAGAGCAGAACGAGCATCACC                               |
| <i>NbERD</i> -F                | CACTGATAAGAACTATGCGTTCAC                            |
| <i>NbERD</i> -R                | CTAAGCTAATCACATTCAGCGAG                             |
| <i>NbLEA</i> -F                | GGATCTAATTGACAAGGCGAAG                              |
| <i>NbLEA</i> -R                | CTCGCCGCTATAAGAGAGAG                                |
| <i>NbNCED</i> -F               | CGACCCACGAGTCCAGATTTC                               |
| <i>NbNCED</i> -R               | GAGCCTAGCAATTCCTCCGAGTG                             |

**Table S2 PCR amplification systems and programs used in this study**

| <b>Test name</b>                               | <b>The PCR system</b>                                                                                                                                                                                                                  | <b>The PCR program</b>                                                                                                                                                                      |
|------------------------------------------------|----------------------------------------------------------------------------------------------------------------------------------------------------------------------------------------------------------------------------------------|---------------------------------------------------------------------------------------------------------------------------------------------------------------------------------------------|
| Cloning of <i>ScDREB2B-1</i> gene              | 10 × Ex Taq Buffer, 2.0 µL;<br>dNTP mixture (2.5 mM), 1.6 µL;<br>Primer-F/R (10 µM), each 1.0 µL;<br>Ex Taq enzyme (5 U/µL), 0.1 µL;<br>cDNA template, 1.0 µL;<br>ddH <sub>2</sub> O, 13.7 µL.                                         | 94 °C, 4 min;<br>94 °C, 30 s, 65 °C-55 °C, 30 s, 72 °C, 2 min, 10 cycles (each cycle lowers 1 °C);<br>94 °C, 30 s, 53 °C, 30 s, 72 °C, 2 min, 25 cycles;<br>72 °C, 10 min.<br>50 °C, 2 min; |
| RT-qPCR analysis                               | SYBR Green PCR Master (ROX), 10.0 µL;<br>ddH <sub>2</sub> O, 7.0 µL;<br>Primer-F/R (10 µM), each 1.0 µL;<br>cDNA template (20-fold dilution), 1.0 µL.                                                                                  | 95 °C, 10 min; 95 °C, 15 s, 60 °C, 1 min, 40 cycles;<br>95 °C, 15 min;<br>60 °C, 1 min;<br>95 °C, 15 s, 60 °C, 15 s.                                                                        |
| Promoter cloning                               | 10 × Ex Taq Buffer, 2.5 µL;<br>dNTP mixture (2.5 mM), 2.0 µL;<br>Primer-F/R (10 µM), each 1.0 µL;<br>Ex Taq enzyme (5 U/µL), 0.125 µL;<br>DNA template, 1.0 µL;<br>ddH <sub>2</sub> O, 17.375 µL.                                      | 94 °C, 4 min;<br>94 °C, 30 s, 55 °C, 30 s, 72 °C, 3 min 30 s, 35 cycles;<br>72 °C, 10 min.                                                                                                  |
| Construction of <i>ScDREB2B-1</i> entry vector | 10 × Ex Taq Buffer, 2.5 µL;<br>dNTP mixture (2.5 mM), 2.0 µL;<br>Primer-F/R (10 µM), each 1.0 µL;<br>Ex Taq enzyme (5 U/µL), 0.125 µL;<br>cDNA template (pM19-T- <i>ScDREB2B-1</i> plasmid), 1.0 µL;<br>ddH <sub>2</sub> O, 17.375 µL. | 94 °C, 4 min;<br>94 °C, 30 s, 71 °C, 30 s, 72 °C, 1 min, 35 cycles;<br>72 °C, 10 min.                                                                                                       |
| Target gene detection in transgenic plants     | ddH <sub>2</sub> O, 9.5 µL;<br>2 × Buffer, 12.5 µL;<br>Primer-F/R (10 µM), each 1.0 µL;<br>DNA template, 1.0 µL.                                                                                                                       | 94 °C, 4 min;<br>94 °C, 30 s, 60 °C, 30 s, 72 °C, 1 min 30 s, 35 cycles;<br>72 °C, 10 min.                                                                                                  |

**Table S3 The amino acid sequences of 51 DREB proteins from A1 to A6 subgroups of DREB subfamily used for phylogenetic tree analysis**

| Subgroups | Protein name                         | Amino acid sequence                                                                                                                                                                                                                                                                                                                                                                                                                                                                                                              |
|-----------|--------------------------------------|----------------------------------------------------------------------------------------------------------------------------------------------------------------------------------------------------------------------------------------------------------------------------------------------------------------------------------------------------------------------------------------------------------------------------------------------------------------------------------------------------------------------------------|
| A1        | AtCBF3                               | MNSFSAFSEMFGSDYESSVSSGGDYIPTLASSCPKKPAGRKKFRETRHPHYRGVRR<br>RNSGKWVCEVREPNNKTRIWLGTFTQTAEMAARAHDVAALALRGRSACLNFA<br>DSAWRLRIPESTCAKDIQKAAAEALAFQDEMCDATTDHGFDMETLVEAIYT<br>AEQSENAFYMHDEAMFEMPSLLANMAEGMLLPSPVQWNHNHEVDGDDDD<br>VSLWSY                                                                                                                                                                                                                                                                                           |
| A1        | HvCBF3                               | MDMGLEVSSSSPSSSSVSSSPEHAARRASPAKRPAGRTKFRETRHPVYRGVRRRG<br>NTERWVCEVRVPGKRGARLWLGTYATAEVAARANDAAMLALGGRSATCLNF<br>ADSAWLLAVPSALSADLADVRRAAVEAVADFQRREAADGSLAIAVPKEASSGA<br>PSLSPSSGSDSAGSTGTSEPSANGVFEGPVVMDSEMFRDLDFPEMDLGSYYMSLA<br>EALLMDPPPTATIIHAYEDNGDGADVRLWSYSVDM                                                                                                                                                                                                                                                        |
| A1        | OsDREB1A<br>(LOC_Os09g350<br>30.1)   | MCGIKQEMSGESSGSPCSSASAERQHQTWVTPPKRPAGRTKFRETRHPVFRG<br>VRRRGNAGRWCVRVPGRRGCRLWLGTFTDAEGAARAHDAAAMLAINAGG<br>GGGGGACCLNFADSAWLLAVPRSYRTLADVRHAAVEAEVEDFFRRRLADDALS<br>ATSSSTTPSTPRTDDEESAATDGDESSSPASDLAFELDVLSDMGWDLYYASLA<br>QGMLMEPPSAALGDDGDAILADVPLWSY                                                                                                                                                                                                                                                                      |
| A1        | OsDREB1B                             | MEVEEAAYRTVWSEPPKRPAGRTKFRETRHPVYRGVRRRGGRPGAAGRWWCE<br>VRVPGARGSRWLWGTFTATAEAAAARAHDAAALALRGRAACLNFAADSAWRMP<br>PVPASAAAGARGVRDAVAVAVEAFQRQSAAPSSPAETFANDGDEEEDNKDV<br>LPVAAAIEVFDAGAFELDDGFRFGMDAGSYASLAQGLLVEPPAAGAWWED<br>GELAGSDMPLWSY                                                                                                                                                                                                                                                                                      |
| A1        | ZmDREB1.2<br>(GRMZM2G069<br>082_P01) | MDMGRHQLQLQHAASSSTSASSSSEQDKPLCCSGPKKRPAGRTKFRETRHPVF<br>RGVRRRGAAGRWCVRVPGRRGARLWLGTYLGAEEAAAARAHDAAAMLALGR<br>GAACLNFPDSAWLLAVPPPPALSGGLDGARRAALEAVAEFQRRRFGAAAAD<br>ATSGTSPSSSSSATKPAPIERVPVEASETVALDGAVFEPDWFGMDLDLYAS<br>LAEGLLVEPPPPPPPAAWDHGDCCDSGADVALWSY                                                                                                                                                                                                                                                                |
| A1        | ZmDREB1.3<br>(GRMZM2G069<br>146_P01) | MCPTKKGMTGEPSSPCRSASASTLPEHHQTVWTSPPKRPAGRTKFRETRHPVFR<br>GVRRRGSAGRWCVRVPGRRGCRLWLGTFTDAEAAAARAHDAAAMLALAGA<br>AACCLNFADSAWLLAVPASCASLAEVRHAAVEAEVEDFLRHQVVPEDDALAA<br>TPSSPSEDGNTSDGGESSDSSPPTGASPFEDVFNDMSWDLHYASLAQGLLVE<br>PPSAVTAFMDEGFADVPLWSY                                                                                                                                                                                                                                                                            |
| A1        | SsAP2/ERF-027                        | MCPIKKEMIGDSSSPCSSASSEHQTWVWTSQPKRPAGRTKFRETRHPVFRGVRRR<br>GNAGRWCVRVPGRRGCRLWLGTFDAAEAAAARAHDAAMLAIAAGAGRACL<br>NFADSAWLLAVPASYASLAEVRHAAVEAEVEDFLRREVVPDPEDDALSATSTP<br>PSSPSSDDGSTSDGESSDYSSPAATGAVSAFELDVFNDSWDLHYASLAQGM<br>LVEPPSAVTAFMDEGFADAARVAACYGVLVLTSRDVAVAAAPLGAPKPQLET<br>RILHSPLALGLYLPRAEPTSEQQRTQLGSLRPGRAVTGRACLFRDRKNKYVARA<br>YNLLLTKAATSLAVRDASDDDIGAPTRHGCAGGAEASSVRPPTSWARGQT<br>LFIERGEPAKPKGSDVLSAFPGRSRSIPSKWPFQNTSGRQQDCGSGIGTA<br>ATHSPHAVQVRELPGCRCPLCDTDTVGGFSIAAHKMLPSRAARPPGAEMVLA<br>RNTFLFIHS |

Continued Table S3

| Subgroups | Protein name                        | Amino acid sequence                                                                                                                                                                                                                                                                                                                                                                                                                                                                                                                                                                   |
|-----------|-------------------------------------|---------------------------------------------------------------------------------------------------------------------------------------------------------------------------------------------------------------------------------------------------------------------------------------------------------------------------------------------------------------------------------------------------------------------------------------------------------------------------------------------------------------------------------------------------------------------------------------|
| A1        | SsAP2/ERF-028                       | MCPIKKEMIGDSSSPCSSASSEHQTIVWTSPPKRPAGRTKFRETRHPVFRGVRRRG<br>NAGRWWCEVRVPGRRCRLWLGTFDAAEAAAARAHDAAMLAIAGAGRACLN<br>FADSAWLLAVPASLASLAEVRHAVTEAVEDFLRREVVPDPEDDALSATSSTPPS<br>SPSSDDGSTSDGGESSDYSSPAATGAVSAFELDVFNDMMSWDLYYASLAQGMLV<br>EPPSAVTAFMDEGFADSKMCPIKKEMSAESSASASSWPSSSPSTSSEHHQTIVWTS<br>PPKRPAGRTKFRETRHPVFRGVRRRGNAGRWWCEVRVPGRRCRLWLGTFTD<br>AEAAAARAHDAAMLAIAGAGACLNFAADSAWLLAVPVSYASLADVRRRAVAEAV<br>EDFLQRRDGEAAAAGDTNARSATSSSAPSTSGNEDDAATDGEESPATDTEDSS<br>FQLDVFNDMMSWDLYYASMAQGMLMELPSAVPAFGDDGDANVADVLSWSY*                                                       |
| A1        | SsAP2/ERF-029                       | MCPIKKEMIGDSSSPCSSASSEHQTIVWTSPPKRPAGRTKFRETRHPVFRGVRRRG<br>NAGRWWCEVRVPGRRCRLWLGTFDAAEAAAARAHDAAMLAIAGAGRACLN<br>FADSAWLLAVPASLASLAEVRHAAEAVEDFLRREVVPDPEDDALSATSSTPPP<br>SPSSDDGSTSDGGESSDYSSPATGAVSPFELDVFNDMMSWDLYYASLAQGMLV<br>EPPSAVTAFMDEGFADVPLWSY*                                                                                                                                                                                                                                                                                                                           |
| A2        | ZmDREB2A<br>(GRMZM2G006<br>745_P01) | MTLDQNHAMPMQPPALQPRKKRPRRSRDGPTSVAAVIQRWAERNKHLEYE<br>ESEEAKRPRKAPAKGSKKGCMKGKGGPDNTQCGYRGVRQRTWGKWVAEIRE<br>PNRVDRLWLGTFTPTAEDAARAYDEAARAMYGDLARTNFPQDATTSAQAAL<br>ASTSAQAAPTAVEALQTGTSCESTTTSNYSDIASTSHKPEASDISSSLKAKCPAGS<br>CGIQEGTPSVADKEVFGPLEPITNLPDGGDGFDIGEMLRMMESDPHNAGGADA<br>GMGQPWCLDELDSSVLESMLQPQPEPEPFLMSEEPDMFLAGFESAGFVEGLERL<br>N                                                                                                                                                                                                                                  |
| A2        | OsDREB2A<br>(LOC_Os01g071<br>20.1)  | MERGEGRRGDCSVQVRKKRTRRKSDGPDZIAETIKWWKEQNQKLQEENSSRK<br>APAKGSKKGCMAGKGGPENSNCAYRGVRQRTWGKWVAEIREPNRGRRLWL<br>GSFPTALEAAHAYDEAARAMYGPTARVNFADNSTDANSCTAPSMLMMSNGP<br>ATIPSDEKDELESPPFIVANGPAVLYQPDKKDVLERVVPEVQDVKTEGSNGLKR<br>VCQERKNMEVCESEGIVLHKEVNISYDYFNVHEVVEMIIVELSADQKTEVHEEY<br>QEGDDGFSLFSY                                                                                                                                                                                                                                                                                 |
| A2        | LcDREB3a                            | MTVHQMEAAAAAALPYAPFEIPALQPRKKRPRRSRDGPNSVSETIRRWKEVN<br>QQLEHDPQGAKRARKPPAKGSKKGCMQKGKGPENTQCGFRGVRQRTWGKW<br>VAEIREPNRVSRWLWLGTFTPTAEVAAQAYDEAARAMYGPLARTNFPQLQDAQAP<br>AVAVPAAIEGVVRGASASCESTTTSNHSDVASSSHNKQPQAQAPEISSQSDVLE<br>STQSVVLESTQSVVLESVRHYGQQETVPDAGSSIAIRSTYEEDVFEPLPISSLPDGE<br>ADGFDIEELLRLMEADPVEVEPTTGGCWNEFQDAGANTGGSWNANTGVEMG<br>QQEPLYLDGLDQGMLEGMLQSDYPYPMWISEDRAHNPFAFHDAEMSEFFEGL<br>MGAYDQVSVRPLDSSRKRKSRSRGDSRSVAETIAKWKEYNEHLYSGKDDGRS<br>TRKAPAKGSKKGCMKGKGGPQNYECNYRGVRQRTWGKWVGEIREPNRGSRL<br>WLGTFTSTAQEAALAYDEAARAMYGPCARLNFPNISDYASVKESFKDSFLAASSS |
| A2        | VuDREB2A                            | CSSTTSDTTTTTTSNRSEVCAAEADAKENVLPALDKGNHSDCHKAYEYASPTSR<br>MKLEPKDDEAGEGIIHHAEQAENVNEDQMDFSWIDALDFNDDYSKSFNDEL<br>FQVDELLGLIENNPVDDSGLMQGLDFGQTGFPGESNPQVDDTSSSFFYQLQNP<br>DAKLLGSLPHMEQTPSGFDYGLDFMKTVPEDYDGGGEEPQFLNLDDVLNHD<br>SKEMVASKE                                                                                                                                                                                                                                                                                                                                            |

| Subgroups | Protein name                      | Amino acid sequence                                                                                                                                                                                                                                                                                                                                                                                                                                                                              |
|-----------|-----------------------------------|--------------------------------------------------------------------------------------------------------------------------------------------------------------------------------------------------------------------------------------------------------------------------------------------------------------------------------------------------------------------------------------------------------------------------------------------------------------------------------------------------|
| A2        | OsDREB2B<br>(LOC_Os05g27930.1)    | MTVDQRTTAKAIMPPVEMPPVQGRKKRPRRSRDGPTSAETIKRWAEELNNQQELDPQ<br>GPKKARKAPAKGSKKGCMKGKGGPENTRCDFRGVRQRTWGWVVAEIREPNQQSRLW<br>LGTFTPTAEAAACAYDEAARAMYGPMARTNFGQHHAPAASVQVALAAVKCALPGGG<br>LTASKSRTSTQGASADVQDVLTGGLSACESTTTTINNQSDVVSTLHKPEEVSEISSPLRAP<br>PAVLEDGSNEDKAESVTYDENIVSQQRAPPEAEASNGRGEVFEPELEPIASLPEDQGDYC<br>FDIDEMPLRMMEADPTNEGLWKGDKDGSDAILELGQDEPFYYEGVDPGMLDNLLRSDE<br>PAWLLADPAMFISGGFEDDSQFFEGL                                                                                   |
|           | ZmDREB2.2<br>(AC209257.4_FG P006) | MGGPDNTRHNYRGVRQRRWGKWVAEIREPNRGKRHWLGTFDNPVDAAVAYDRAA<br>VSIHGAHAHLNFPSCAATTADASLEHEAKPMVAAAALGGGGAEAVSQRQEDDDPHD<br>IAMYIDFDAVFDMPVFCCHGKREDQCHEGFDGDAVHSPLWALGD<br>MDHRLPPVAMQVAAMQRQRQQQQQQQFVHHLQVHQQQGTHHQLPPAPPPPQQQQ<br>HQNSGGVGSRAAGGRRCCPLRQSRKGCMKGKGGPDNQCPYRGVRQRTWGWVVA<br>EIREPNRGTRLWLGTFGSAFEAACAYDNAARKLYGDCAHLNLQLPPPAVAAMAAGG                                                                                                                                                |
| A2        | SsAP2/ERF-006                     | GGPAVVVSSPSPDTVAAGPAAAAGGHNRRHQYLQQQQQQQAAMAAAPMMMMQY<br>SSSYSADASSNSGSFSNSYSSSSPVTTAAVAASPTYNNHHQMFQMTPPPSSCSGVMM<br>APAVPQAQGCCHVNTTTTTTTTTMEMQRHQQMIRELAAAPLHQEPDDFADFMTWLPEA<br>EDFGLQGFQEVPPPEVFDEAAGGIWDHTAATWSTPTMMIDSAAGAAQHQQ<br>MVSHMDMLIRSRSNKQIDRTRQTGGGLIRNRMLCTSYYEEHHVKSTLVRAKNAVRWIF<br>TPRIHAALITMTTNQRARLSLFLYVLTLTGLEKARHHRTYAETHAFPAVTTFKPTPCLA<br>DHPRRRPARAHSTKPPAPLVTLSSTPTPTPIPIPMESYGRKRAWKKGPTRGKGGPQNAA<br>CEYRGVRQRTWGWVVAEIREPNKRTRLWLGSFATAEEAALAYDEAARRLYGPD AFLN |
| A2        | SsAP2/ERF-020                     | LPHLRASVSAAAHQRLRLWPASARGAAAAAVPAYGLNLNAQHNHVIHQRLQELK<br>NGGSPAKPPPPQPARQVAPVHHLPAAASTSPCSTVTTHAVAALPPPMSCFHAEQAVA<br>AAAMTTADDDAEPCGGACPPGADKPQLDLREFLQQIGVLKTDDEGMTATAKASYH<br>GDAADAGCFGGNGEFDWDALAADLNDIAGAHGGAIGVNNGGFQMDDLHEVDQFGT<br>CLPIPVWDV*                                                                                                                                                                                                                                          |
| A2        | SsAP2/ERF-051                     | MRRKSTGPDSIAETIKWWKEQNQKLQDESGSRKAPAKGSKKGCMTGKGGPENVCVY<br>RGVRQRTWGWVVAEIREPNRGRRLLWLSFPTAVEAAHAYDEAAKAMYGPKARVNFS<br>ENSADANSCTGTSALSLASSVPAATLQRSDEKVETEVESEVTEVHEVKTEGNDLGSVH<br>VACKTVDVQSEKSVLHKEGEVSVDYFNVEEVVEMIIELNADKKIEAHEEYHDGDDGFS<br>LFAY                                                                                                                                                                                                                                         |
| A2        | SsAP2/ERF-107                     | MTLDQNQAMPMQPPALLPGRKKRPRRSRDGPTSAAVIQRWAEHNKQLEHDPEGAK<br>RPRKAPAMGSKKGCMKGKGGPDNTQCGYRGVRQRTWGWVVAEIREPNRVNRLWL<br>TFPTSEDAARAYDEAARAMYGDLARTNFPQRQAATYAQAALASTSVQAAPTAVEALR<br>PGTSCESTTTSNHSDIASTSHKPEASDSSSLKAEWPEALEAGSSGIQAGTPSVADKVFGT<br>LEPITNLPDGGDGGVTNLPDGGDDGFDVDEMLRMMEADPHNEGGADAGMGQPWCL<br>DGLDSSVLESMLQSEPEPFMLMSEPEMFLAGFESPSSFFEGLERLK*                                                                                                                                     |
| A3        | SbERF7<br>(Sb01g040280.1)         | MVKNPGSNGVLTATAFSDNKLARPESGVVGNGKAAARPYKGVMRMRWSGWSVSEIRA<br>PNQKRRIWLGSYATPEAAARAYDAALLCLKGSDAVLNFPATSTSSASASSSHRRADKD<br>DDPAAGGGMSPRSIQRAAAAAAIDAADAGGISADDRCSSACAMTPTSASLSSTQGSS<br>DHVRQEQAHTTTSPAAASTGSPPEGEELWTDLEAFASPKFMDLVDTGAAAPFSSTWEE<br>PEDDGELMRLWSFC                                                                                                                                                                                                                             |



Continued Table S3

| Subgroups | Protein name               | Amino acid sequence                                                                                                                                                                                                                                                                                                                |
|-----------|----------------------------|------------------------------------------------------------------------------------------------------------------------------------------------------------------------------------------------------------------------------------------------------------------------------------------------------------------------------------|
| A3        | SbERF40<br>(Sb03g042060.1) | MMRRAEPVGEAADAERRRGRGGYKGVRRRRWGWKWWSEIRVPGTRERLWLGSYAT<br>PEAAAVAHDTAVYFLRGGTGAGAGTGAGVAGGGDVAALNFPERAAAAYGTGA<br>GAGAAGRLSPRSVQRVASDAGMAADAQLVAARESAPAPALAHARTGIGIGSA<br>HDGGASAHARPGAGREQPAVSGEINVDDMEILM<br>MVKSAQLQDTAVDGAAGNAVAARQQGAGAPAGYSGGGKRQYKGVMRMSWG<br>SWVSEIRAPNQKTRIWLGSYSTAEAAARAYDAALLCLKGSAADLNFPVHLPFHIP<br>A |
| A3        | SbERF55<br>(Sb04g034290.1) | AAMSPKSIQRVAAAAANATCSPLPAAAPYSASTAVNDGATPPCSYYGDASSG<br>VSSPETGNADLCHDGMDMAGDADFAALADIEAFFQSPKMEYGMMDPCSTFFA<br>PAPMATDAANEWEEEGEINLWSFSSLN<br>MDDGAGASRSDGEGSPRLPAERRYKGVFRKWGRWVSEIRMPNSRERIWLGSYSS<br>AEKAARAFDAAAVCLRGSRAGSLNFPESPPNVRHIPGAMLTPEQIQAEARHAN<br>Q                                                                |
| A3        | SbERF82<br>(Sb07g022265.1) | QLLPSPPVASPAASSSSQPAAGGASSDRTTSLMPPSTYYGSGAAVCGDDEALDWS<br>FMDALPSMPASSMGMGNSGADIVPALDDFMYGSPHPVMPPEEVTQDMIDDDD<br>DHTFISDDLWRF<br>MSRAASGGGAGTGRGGGGGAERAHRCRYRGVRRRAWGWKWWSEIRVPGTRERLW<br>L                                                                                                                                     |
| A3        | SbERF94<br>(Sb09g020690.1) | GSYAAPEAAAVAHDAACLLRGGGGRAAGQAHLNFPDRAACYIVYGGSHGH<br>GPPLSPRSVQRVASDAGMAADAQIVDARAAAAALAAPTTRVQPAAFAGIGAAQ<br>GGAQGAACAPPPYSDGASSSSSTYWSTPSASASRTSSSTGSEQPLVFGDISVDDIEIL<br>V<br>MSSSPETEAGSSSGGKKFKGVRRKRWGWKWWSEIRLPNSRERIWLGSYDAPDKAAR<br>AFDAAFVCLRGGRGAAGADLNFPDSPPPCRAGGCSSDPREVQAAALSHANRAAVT<br>A                         |
| A3        | SsAP2/ERF-056              | AQQAAAFIMDDAEADGGSAAPWDYYSVAHDAGGVLGAAATSATEVVAPVR<br>ADGSIDWRPIMAHPPPLFSPTGWGSNAYDFLQVPPPAAVADEDMDDGIHGATA<br>SLWSFDRDSYFRH<br>MVKTAVAASSNDAAAARHGGSGKQRTYKGVMRMSWGSWVSEVRAPGQKTRIW<br>L                                                                                                                                          |
| A3        | SsAP2/ERF-071              | GSHSTADAAARAYDAALLCLKGSAAAPDLNFPRLRPLFDLPPAGAMSPKAIQVRA<br>AAAAASSATPFAPCAENNGSACTDGDGDITPAWSSSSPARDDVSSPESTVSSSED<br>LSGD<br>MNDGAGASRSDGEGSPRLPAERRYKGVFRKWGRWVSEIRMPNSRERIWLGSYSS<br>AEKAARAFDAAAVCLRGSRAGSLNFPESPPNVRHIPGALLTPEQIQAEARHANQ<br>Q                                                                                |
| A3        | SsAP2/ERF-097              | QLPSPPVASPASSSSQPAPAPPAGGASSDRTALSMPTYYSSGDAVCGDDEALDWS<br>FMDALPSSMPASSVGMGNSADIVPALDDFMYGSPHQVMPPSEEATHDMIDSDDD<br>HTFISDDLWRF*                                                                                                                                                                                                  |
| A4        | SbERF46<br>(Sb04g022943.1) | MENHHLQQQQQQQQPAAAATASSPQYRGVRRRKWGWKWWSEIRQPGTKVRVW<br>LGSFDSAEEAAVAHDVAALCLRGPRDAQLNFPGSAGWLPRPPSTD PADIRAAAA<br>EAAERVRRPALVGTSAAAAEPGAGSRVHAASASRLDLAVGDEFDDDLASPRL<br>WTEMAEAMLLDPPKWGPDGSDGSDGSGSQHWPQGSWLDAC<br>MATKQFRMAAAYSGTSMHEQPLRCITTRWRWPWRLLYKSAVITRESTLHLHHRSE<br>A                                                |
| A4        | SsAP2/ERF-069              | ASYLLSSS GRALPHSMENHQQQQQPAAAASSPQYRGVRRRKWGWKWWSEIRQPGT<br>KVRVWLGSFDSAEEAAVAHDVAALCLRGPRDAQLNFPGSAGWLPRPASTDPADI<br>RAAAAEAAERVRRPALVGTAAAAEPGSVPASASGRDLAVGDEFDDDLASPR<br>LWTEMAEAMLLDPPKWGPDGSDGSEGSQGHWPQGSWLDGC*                                                                                                             |

Continued Table S3

| Subgroups | Protein name               | Amino acid sequence                                                                                                                                                                                                                                                                                                                                                                                                                                                                                                                                                  |
|-----------|----------------------------|----------------------------------------------------------------------------------------------------------------------------------------------------------------------------------------------------------------------------------------------------------------------------------------------------------------------------------------------------------------------------------------------------------------------------------------------------------------------------------------------------------------------------------------------------------------------|
| A5        | SbERF6<br>(Sb01g029065.1)  | MAQELQLETSSSASATTTSSCTTSCCSSTVTDSSSSSPAAANAAPAPRKRQA<br>AEAEAEAEAEAEAEAVEEEEEEGCAGKTTAPAAKKRKRSEGGKHTYRQV<br>MRAWGKWVSEIREPRKKSRIWLGTFTAEEMAARAHDVAALAIKGRAATA<br>YLNFPDLAGVLPRAASAAPKDVQAAAAALAAFTSPSSPSSEPGDDAGAPA<br>APCDAREEPAAAAKGGAAPEETAEEEREPVPLPPPVSQPGTPSSSGVEEER<br>QLFDLPDLLLLDIRDGFSGCFPPMWAPLDTDVEEVVNAELRLEEPLLWE<br>MEREQEAEAGTAQQLLGRRVRADTRHPVYRGIRYRGKWVSEIREPRKSN<br>RIWLGTYPAPEMAAAAAYDAAALALRGAEALNFPGAAMSRPAPASCPD<br>DIRAAAAAAAAAAVIGRSHSPQVGGEAAAGGCGASTWSSGAGAQQQVP<br>EHRAGDRRIVDEDDVFQVPRLLAGMAEGLMMSPPRLVGPATDGAVLLEE<br>DGSEDGVVSLWDHS |
| A5        | SbERF14<br>(Sb01g049400.1) | MAMSELSSDTSSSYSSDPSTSTSPRAAAPCSAAAASVSGKKRPRSNGGGES<br>GSAPAYRGVIRMRAWGKWVSEIREPRKKSRIWLGTFTCPPEMAARAHDVAA<br>LSIKGARAVLNFPDLARHLPRPASLAPRDVQAAAAARAALMHMHSDGAG<br>SGSGSGSSSPSSSSSSSTRDAADTDGAAAHDEPEPEPEPQRQHERQPVEM<br>AAELVFDELAPLWVEDVVEFGGPPSDHTWTPCDGLDAAVGFHLPLLLW<br>DY                                                                                                                                                                                                                                                                                      |
| A5        | SbERF33<br>(Sb03g002630.1) | MAEQPLPRPHSPSTPAAVQVQVQPGPAAASHQAAPSSGSAPASPRSPSPLL<br>LLLQGGDGGTSSAGAAAASSVATAPSTTMATSSGEPSPRSSGKHAFYRGIR<br>CRSGKWVSEIREPRKARRIWLGTYPTEMAAAAAAYDVAARALRGADAVLN<br>FPGAIAASRAAPASAPADIRAAAAAAAAAAAAQLEYAQSSQGTAAANHPPPA<br>AARQDHRWHHQQQQHGVMMMSGGASATADAAASLYNTPQQQQQQQEI<br>GGDEFMDDEAIFEMPQLLRNMAAGMMMSPPRLSPDTSDESPDPSEAGESL<br>WSYHDP                                                                                                                                                                                                                          |
| A5        | SbERF51<br>(Sb04g031960.1) | MAMDDSSSGSEPEPTSSSSVEAPASPTASSSDSASAAGSDSKKRRRTKDGH<br>HPTYRGVIRMRAWGKWVSEIREPRKKSRIWLGTFTAEEMAARAHDVAAL<br>AIKGRAAHLNFPDELAGEPRPATAAPKDVQAAAAALAAADFPATPANA<br>AGADDDCGPDASAASDDVSASASPPPATTLNPDALFDLPDLLLLDLRH<br>GASSCQLLSCAPSWYDDVCFSGAAAGAFRLLEEPLLWEY                                                                                                                                                                                                                                                                                                          |
| A5        | SbERF52<br>(Sb04g032940.1) | MEADALLHAPTTSSSCSDSGGGSCVINGAQERLSKTGGKPHKNVKKRRTA<br>SSPPAAPGGVAVAPEATVDDDCGGGGGRQRKRGSAGTRHPTFRGVRMR<br>VWGKWVSEIREPRKKSRIWLGTFTAEEMAARAHDVAALAIKGRAAHLNF<br>PHLAHELPRPASTSPADIQAAAAKAAAAAAAAAADADVEQCESSHHIAE<br>TPSSSSSSAANSEEVAAASNSEESVLLFDLFDLPDLLLLDLRDGLWSPIWEAAA<br>PAAAAEEYDGDLSLEPLLWAHDHCWMDAAAVPVQPD                                                                                                                                                                                                                                                   |
| A5        | SbERF53<br>(Sb04g032960.1) | MDAPAQRAMAVDTGNAPTTSCSSSSSTSSSSSVNDAPQEVVPKNSCKGTN<br>KRKRASSPDSQEQEVEANGSTNNGHHQGESSSSCCSTDDTEASVGDDKA<br>EEAAAATATRSSRSGYKHPYRGVRRRSWGKWVSEIREPRKKSRIWLGTFT<br>TAEMAARAHDVAALAIKGRAAHLNFPDRAHELPRPASTSPADIQAAAA<br>QAAAGAADVQCDAPPSPSPSPSSSAELLPLSSPAADADASPEQAAAAT<br>MTTTHGDGGGGQGGQGGQGESALFDLPDLLLLDLRDGLWWPPVWPAAAM<br>AAEEYDGCDDVGMHDEPLLWAE                                                                                                                                                                                                                 |
| A5        | SbERF69<br>(Sb06g024530.1) |                                                                                                                                                                                                                                                                                                                                                                                                                                                                                                                                                                      |

Continued Table S3

| Subgroups | Protein name               | Amino acid sequence                                                                                                                                                                                                                                                                                                                                                                                                                                                                                                                                                                                                                                                          |
|-----------|----------------------------|------------------------------------------------------------------------------------------------------------------------------------------------------------------------------------------------------------------------------------------------------------------------------------------------------------------------------------------------------------------------------------------------------------------------------------------------------------------------------------------------------------------------------------------------------------------------------------------------------------------------------------------------------------------------------|
| A5        | SbERF70<br>(Sb06g024540.1) | MEHEQVVSPQVSEGCCTCSSSFSNTTTTSGGGGSLNASSPSSSDDSGGGG<br>NKGTKRPRRDLKHPTYRGVVRMTWGKWWSEIREPRKKSRIWLGTFDNPE<br>MAARAHDAAAVAIKGRAAHLNFPDLAHELPRAAASAAPKDVQAAAAAL<br>AAATVVVAASPAVVPSSCGHDDADAETEDLPPPERAMPECESVNQAQL<br>EQLGGDIDSGLGFTFLDVPDALLDFGHMLSPLPLPSYCGSPWDDIADDLC<br>FEEPLLLWEH                                                                                                                                                                                                                                                                                                                                                                                          |
| A5        | SbERF71<br>(Sb06g025890.1) | MSDRGGPASPRSGKHPFYRGIRSRSGKWWSEIREPRKTRRIWLGTFTAE<br>MAAVAYDVAARALRGADAALNFPHLAASRPAPASTSADDIRAAAAEA<br>AASLLLQQEQQQQPADHHQPPARGGAPGRGIAPAEAGAAQQQTGGSS<br>AAAWAQQEGGSGAGNPYFLDEEALFETPQYLRNMAAGMMMSPPRFGR<br>NSSDDSPDHPSSSDAGDSLWSYRDP                                                                                                                                                                                                                                                                                                                                                                                                                                      |
| A5        | SsAP2/ERF-067              | MEEERALSPVSDACTTCSSSGGTGPNSPIASSSQSLDDTSGGGAGGSSSRK<br>RPRRELKHPTYRGVVRMRAWGKWWSEIREPRKKSRIWLGTFTDTPEMAAR<br>AHDVAALAIKGRAAHLNFPPEMSHELPRAAASAAPEDVRAAAAALAAAME<br>TRESVAPPASSDSIHGARNEDNEEPAPSSSSGNDADDSAQSEEPAAAPPSE<br>HSMLADGHILDALFELPDVLLFEGFALPPPLTSSVAALGALTTRKGERD<br>MRAIPQYPGTARQPGH TLGSLFASLSYPLQHQQYVHLCSSRPE*<br>MAVDTSNAPTTSCSSSSSTSSSSSVNDAPQEVVPKNCKGTNKRKRRTSSP<br>DSQEVEANGSTNNGHRVEESSSCCSTEASVGNKEAEEAAAATATRSRS<br>GYKHPSYRGVRRRSWGKWWSEIREPRKKSRIWLGTFTAEEMAARAHDV<br>AALAIKGRAAHLNFPERAHHELPRPASTSPADIQAAAAQAAAAAEVQCD<br>APPSPAPSPSSSAELLPSSPAADADASPEQAAADCCCPEAAAAATTTTTTH<br>GGDGGGQVQETALFDLPDLLLLDLRDGLWWPPVWPAAAMAAEEYDCC<br>DVVGMHEPELLWAE* |
| A5        | SsAP2/ERF-075              | MLLPDETNIKQPESNVGSVLQTDHRPSEKQKQRETL LGVVISSKLSGFTRSP<br>SSHSPRHQVSPQLSEGCTCSSSNTSSLNASSPSSSDDSGSVKQGTKKRPRR<br>DLKHPTWGKWWSEIREPRKKSRIWLGTFD DPESAARAHDAAAVAIKGR<br>AAHLNFPDLAHELPRAAASAAPKDVQAAAAALAAATVAAAASPVVIPSC<br>AHAHGHGDADTETEELPPPERAMPEECETENQAQLEQLGGDIDIGLGC<br>TFLDVPDALLDFGYMLSPLPLSSYCGSPWDDIADDLCFDEPLLLWEH*<br>MQFIQAQLHLQRNPGLGPRAQPMKPAVPVPPAPAPQRPVKLYRGVRQR<br>HWGKWVAEIRLPRNRTRLWLGTFTAEQAALAYDQAAAYRLRGDAARL<br>NFPDNAESRAPLDPVDAKLQAICATIAAASSSSKNSKAKSKAMPINAS<br>VLEAAAASPSNSSSDEGSGSGFGSDDEMSSSSPTPVVAPPVADMGQLDFS<br>EVPWDEDESFVLRKYPSYEIDWDALLSN                                                                                              |
| A5        | SsAP2/ERF-076              | MAATTIDWHGRNAALYGVADRDSKELVRALAPPMQQAAPTISFAYPCS<br>GVEQQSAAAAAGSFLGAGGSSGLLTPAQILQLQSRLQFLRRPAAGGATL<br>AAVTTQQMQRQGVQPAPAPLTSRPAVSKLYRGVRQRHWGKWVAEIRL<br>PRNRTRLWLGTFTDTEEAALAYDSAAFRLRGDSARLNFPELRRGGQHL<br>GPPLHAAVDAKLHAICNGTTDVVVPLPQSQSQSQSQSQSHATTATATT<br>PSSLSSASPHVKSEPGCSGSESSFSADGDVSSTGSSDVVPEMQLLDFSEAP<br>WDESESFHLRKYPSLEIDWDSILIS                                                                                                                                                                                                                                                                                                                         |
| A6        | ZmDBF1<br>(AAM80486.1)     |                                                                                                                                                                                                                                                                                                                                                                                                                                                                                                                                                                                                                                                                              |
| A6        | SbERF8<br>(Sb01g044410.1)  |                                                                                                                                                                                                                                                                                                                                                                                                                                                                                                                                                                                                                                                                              |

Continued Table S3

| Subgroups | Protein name                | Amino acid sequence                                                                                                                                                                                                                                                                                                                                                                                                                                                                                                                                                                                                                                                                       |
|-----------|-----------------------------|-------------------------------------------------------------------------------------------------------------------------------------------------------------------------------------------------------------------------------------------------------------------------------------------------------------------------------------------------------------------------------------------------------------------------------------------------------------------------------------------------------------------------------------------------------------------------------------------------------------------------------------------------------------------------------------------|
| A6        | SbERF21<br>(Sb02g023230.1)  | MAAAIDLSGEELMRALEPFIRDASSAPHGSSPLLHPHHQPLSPSSPFS<br>FHHAAYGGYPFAAAAAEGAGQLSPAQMQYIARLHLQRQSQQS<br>SVLGPRAPMKASAAAAPTTPRPQKLYRGVRQRHWGKWVAEIRLP<br>RNRTRLWLGTFTDAEEAALAYDQAAYRLRGDAARLNFPDNAASR<br>GPLHASVDAKLQTLQCQNIASKKGAKKHAASASAAAAAATSSSAPT<br>SNCSSSPSSDDASSSCCLESAAESSCSPSPSPSPSPESSTVPQMQLDFSE<br>APWDEAAGFALT KYPSY EIDWDSLLAAN<br>MAAAIDMYKYNAHQIASSSPSDEELAKALEPFITSASSSSPYHRYSS<br>SPSMSQDSYMP TSYTSFATSPLTPAATSSSSSPFSQLPPLYSSPYAAP<br>SMVGQMGLNQLGPAQIQQIQAFMFQQQQQQQRLHAAFLGPR<br>A6                                                                                                                                                                                       |
| A6        | SbERF49<br>(Sb04g027660.1)  | AQPMKQSGSPPLAPAQSKLYRGVRQRHWGKWVAEIRLPKNRTRL<br>WLGTFTDAEDAALAYDKAAFRLRGDMARLNFPALRRDGAHLGPR<br>LHASVDAKLTAICQSLTGSKNGGSSGDESAGSPDPSPKCSASASTEG<br>EEESGSAGSPSP TLAAPPVPEMAKLDFT EAPWDETETFHRLKYP SWEI<br>DWDSILS<br>MAAAINLPGPSEDLMRAMESFMQEDAAPSPLPMPAAQYPPATPT<br>HLSPAQM QFIQAQLHLQRNPGLGPRAQPMKPAVPIPPAQQRPAQK<br>LYRGVRQRHWGKWVAEIRLPNRNTRLWLGTFTDAEEAALAYDQA<br>AYRLRGDAARLNFPD NAASRAPLDAVD AKLQAICATIAAASSKG<br>GARAQSKAMPINAPVLEATAACPSNSSSDEGSGSDEEMSSRTTTTP<br>VVVAPPVVADMGQLDFSEAPWDEAESFVL RKYPSY EIDWDALLSN<br>MDASLRTLPPAGSSFPGEVRS AVSSLLLSPGGTSALD TVFSHLPPPV<br>TIPPLGSSVYYRQCELLRHFAASQTHQPATATAAACSSSSSSSAASA<br>SFQFQPQAPPDDAAAAAAML RQKLYRGVRQRQWGKWVAEIRLPQ<br>A6 |
| A6        | SbERF80<br>(Sb07g020090.1)  | NRVRVWLGT YDSPETA AHAYDRAAYRLRGEYARLNFP GVM DAPD<br>TDCPDHLRQLRAAVDAKIQAIRARMARKRARARKQREEKESARSG<br>SGANSSKPAAARPVASEGAATTTTTTTTTSETSTTPYGS PDGVL SVSAV<br>SAEGDCPLERMPSFDPELIW EMLNF<br>MAAIDLYTNQLSSSSSSSDQELMKALEPFIRSASSPTSSTSTTTSPFSYS<br>YPYCSALPQDSYYLPATSSYTSFPPPPPAPTAATSFSQLPPLPQSSSYA<br>SPAAASYPTSSSADAASGLAALNHLGPAAQI HQIQAQLLAQH QEQ<br>A6                                                                                                                                                                                                                                                                                                                                |
| A6        | SbERF98<br>(Sb09g029070.1)  | QQQQRGLLA AAAFLGPRATQPMKHAGAPSASSAKLFRGVRQRHW<br>GKWVAEIRLPNRNTRLWLGTFD SAEDAALAYDKAAFRLRGDAARL<br>NFP SLRRGGVHLAGPLDASVDAKLTAICQGLTAE PASSKAADTDA<br>STTATAAPDSPKASASTTTTEGDES VHSAGSPSSLPAFFQPPPPQ<br>QHPEMVSLDFTEAPWDESAALHLNKYPSWEIDWDSILS<br>MAATTIDWHGSNAALPAALYGVADSKELVRALAPPMEQAAPTISF<br>SYPCSGVEHQSAAGSFLGAGGGSGLLTLAQILQVQSRLQFLRRPAA<br>A6                                                                                                                                                                                                                                                                                                                                   |
| A6        | SbERF103<br>(Sb10g007780.1) | AGGGALAAVATQQMKRQGVPHAPAPAPLPARPAVSKLYRGVRQR<br>HWGKWVAEIRLPNRNTRLWLGTFTDAEEAALAYDSAAFRLRGDSA<br>RLNFP ELRRGGQH LGPPLHAAVDAKLHAICNGTL PQSQSNATAAT<br>ATATTTTTPSFSSASPHVKSEPGCSGSESSFSADGDV SSTGSSDV                                                                                                                                                                                                                                                                                                                                                                                                                                                                                       |

Continued Table S3

| Subgroups | Protein name  | Amino acid sequence                                                                                                                                                                                                                                                                                                         |
|-----------|---------------|-----------------------------------------------------------------------------------------------------------------------------------------------------------------------------------------------------------------------------------------------------------------------------------------------------------------------------|
| A6        | SsAP2/ERF-092 | MAAAINLPGPSEDLMRAMESFMQDDAAPSPLAMPPPPRAPRLPL<br>PAAGAHGHGHGAQQYPATTHLSPEQMQFIQAQLHLQRNPGLGP<br>RAQPMKPAVPVPPQQRQPQKLYRGVRQRHWGKWVAEIRLPRNRT<br>RLWLGTFTDAEEAALAYDQAAYRLRGDAARLNFPDNAASRAPL<br>DPAVDAKLQSIATIAAASSSSKGARAKSKAMPINAPVLEAPSNSS<br>SDEGSGSGSGSGSDDEMCSSSATPVVVAPPVVADMGQLDFSEVPW<br>DEAESFVLRKYPSYEIDWDALLSN*   |
| A6        | SsAP2/ERF-098 | MAAAINLPGPSEDLMRAMESFMQDDAAPSPLAMPPPPPPRAPPL<br>PLPAAGAHGHGHGAQQYPATTHLSPEQMQFIQAQLHLQRNPGL<br>GPRAQPMKPAVPVPPQQRQPQKLYRGVRQRHWGKWVAEIRLPRN<br>RTRLWLGTFTDAEEAALAYDQAAYRLRGDAARLNFPDNAASRA<br>PLDPAVDAKLQSIATIAAASSSSKGARAKSKAMPINAPVLEAPSN<br>SSSDEGSGSGSGSGSDDEMCSSSATPVVAAPPVVTDMGQLDFSEVPW<br>DEAESFVLRKYPSYEIDWDALLSN* |
